# **BLOCKADE OF M4 MUSCARINIC RECEPTORS ON STRIATAL CHOLINERGIC INTERNEURONS NORMALIZES STRIATAL DOPAMINE RELEASE IN A MOUSE MODEL OF *DYT1-TOR1A* DYSTONIA**

**Abbreviated title:** M4 muscarinic antagonists in *DYT1-TOR1A* dystonia

Anthony M. Downs, B.S.<sup>a</sup>, Yuping Donsante, M.A.<sup>a</sup>, H.A. Jinnah, M.D., Ph.D.<sup>b,c,d</sup>, Ellen J. Hess, Ph.D.<sup>a,b</sup>

<sup>a</sup>Department of Pharmacology, Emory University School of Medicine, 30322

<sup>b</sup>Department of Neurology, Emory University School of Medicine, 30322

<sup>c</sup>Department of Human Genetics, Emory University School of Medicine, 30322

<sup>d</sup>Department of Pediatrics, Emory University School of Medicine, 30322

**Corresponding author:** Ellen J. Hess, Departments of Pharmacology and Neurology, Emory University School of Medicine, 101 Woodruff Circle, WMB 6303, Atlanta, GA 30322.

+1 404 727 4911. [ellen.hess@emory.edu](mailto:ellen.hess@emory.edu)

**Conflict of interest statement:** The authors declare no competing financial interest.

## **Acknowledgments:**

This work was supported by United States Department of Defense grant W81XWH-15-1-0545 and W81XWH-20-1-0446, United States National Institute of Health Grants F31 NS103363 and T32 GM008602, and Cure Dystonia Now. This research project was supported in part by the Emory University Integrated Cellular Imaging Core. This study was also supported in part by the Emory HPLC Bioanalytical Core (EHBC), which was supported by the Department of Pharmacology and Chemical Biology, Emory University School of Medicine, and the Georgia Clinical & Translational Science Alliance of the National Institutes of Health under Award Number UL1TR002378.

## ABSTRACT

Trihexyphenidyl (THP), a non-selective muscarinic receptor (mAChR) antagonist, is the preferred oral pharmaceutical for the treatment of *DYT1-TOR1A* dystonia. A better understanding of the mechanism of action of THP is a critical step in the development of better therapeutics with fewer side effects. Using a mouse model of *DYT1-TOR1A* dystonia (*Tor1a*<sup>+/ $\Delta$ E</sup> KI mice), we recently found that THP normalized striatal DA release, revealing a plausible mechanism of action for this compound. However, the exact mAChR subtypes that mediate this effect remain unclear. In this study we used a combination of a newly developed M4 subtype-selective mAChR antagonist and cell-type specific mAChR KO mice to determine which mAChR subtypes mediate the DA enhancing effects of THP. We determined that THP and the M4 subtype-selective mAChR antagonist enhance striatal DA release by blocking M4 mAChR on striatal cholinergic interneurons in *Tor1a*<sup>+/ $\Delta$ E</sup> KI mice. However, in *Tor1a*<sup>+/ $\Delta$ E</sup> mice THP increases striatal DA release through a combination of M1 and M4 mAChR, which reveals an alteration in M1 mAChR function in *Tor1a*<sup>+/ $\Delta$ E</sup> KI mice. Taken together these data implicate a principal role for M4 mAChR located on striatal cholinergic interneurons in the mechanism of action of THP and suggest that M4-subtype selective mAChR antagonists may be more efficacious therapeutics for *DYT1-TOR1A* dystonia.

## SIGNIFICANCE STATEMENT

Trihexyphenidyl, a non-selective muscarinic receptor antagonist, is the preferred oral therapeutic for *DYT1-TOR1A* dystonia, but it is poorly tolerated due to significant side effects. A better understanding of the mechanism of action of trihexyphenidyl is needed for the development of improved therapeutics. We recently found that trihexyphenidyl rescues the deficit in both striatal dopamine release and steady-state extracellular striatal dopamine concentrations in a mouse model of *DYT1-TOR1A* dystonia. However, the precise muscarinic receptor subtype(s) that mediate these effects are unknown. We used a newly developed M4 muscarinic receptor subtype-selective antagonist along with M1 and M4 muscarinic receptor knockout mice to determine the precise muscarinic receptor subtypes that mediate the dopamine-enhancing effects of trihexyphenidyl.

## INTRODUCTION

*DYT1-TOR1A* dystonia is an inherited form of dystonia caused by a three base pair deletion ( $\Delta$ gag) in the *TOR1A* gene (Ozelius et al., 1992; Ozelius et al., 1997). Because the precise mechanism(s) that lead to the abnormal movements are unknown, treatments for *DYT1-TOR1A* dystonia are inadequate. The non-selective muscarinic acetylcholine receptor (mAChR) antagonist trihexyphenidyl (THP) is the preferred oral pharmaceutical for *DYT1-TOR1A*, but its clinical use is limited due to significant dose-limiting side effects associated with its nonselective action at all five mAChRs subtypes (Schwarz and Bressman, 2009; Thenganatt and Jankovic, 2014). These side effects include cognitive impairment, constipation, dry mouth, urinary retention, and others (Burke et al., 1986; Jabbari et al., 1989; Guthrie et al., 2000; Lumsden et al., 2016). A better understanding of the mAChR subtype(s) responsible for the therapeutic effect of THP is critical for the development of targeted treatments with fewer side effects.

One potential mechanism of action of THP is the regulation of striatal dopamine (DA) neurotransmission. Abnormal striatal DA neurotransmission is consistently observed in both *DYT1-TOR1A* patients and mouse models of *DYT1-TOR1A* dystonia. In *DYT1-TOR1A* patients, brain DA metabolites are abnormal and D2 DA receptor availability is reduced (Augood et al., 2004; Asanuma et al., 2005). In mouse models of *DYT1-TOR1A*, striatal DA release is reduced despite normal total tissue DA concentrations (Balcioglu et al., 2007; Page et al., 2010; Song et al., 2012; Downs et al., 2019). Striatal DA release is regulated by acetylcholine (ACh) (Zhang et al., 2002b; Zhang et al., 2002a; Exley and Cragg, 2008; Zhang et al., 2009a; Zhang et al., 2009b; Threlfell et al., 2010) and we recently discovered that THP rescues the deficit in both evoked DA release and steady-state extracellular DA concentrations in the striatum of a mouse knockin (KI) model of *DYT1-TOR1A* (*Tor1a*<sup>+ΔE</sup> KI mice) (Downs et al., 2019). However, the mAChR subtype(s) and striatal cell type that mediate the effects of THP are unknown.

THP binds to all 5 mAChRs at nanomolar affinity (Dorje et al., 1991; Bolden et al., 1992), and all 5 mAChRs are expressed in the striatum (Buckley et al., 1988; Levey et al., 1991; Harrison et al., 1996; Alcantara et al., 2001; Yamada et al., 2003; Hernandez-Flores et al., 2015). M1 and M4 mAChRs are the most highly expressed subtypes in the striatum (Levey, 1993). M1 mAChRs are expressed on both direct and indirect striatal projection neurons (dSPNs and iSPNs) where they mediate corticostriatal plasticity (Harrison et al., 1996; Hernandez-Flores et al., 2015). M1 mAChRs also mediate extracellular DA concentrations, although the underlying mechanisms are unknown (Gerber et al., 2001). M4 mAChRs are expressed on dSPNs where they regulate corticostriatal plasticity (Nair et al., 2015; Nair et al., 2019) and mediate striatal DA release via endocannabinoid signaling (Foster et al., 2016). Additionally, M4 mAChRs expressed on cholinergic interneurons (ChIs) act as inhibitory autoreceptors to modulate extracellular ACh concentrations, which play a central role in mediating DA release (Threlfell et al., 2010; Pancani et al., 2014). Thus, THP may act through M1 or M4 mAChRs or both to enhance DA release. In this study, we used a combination of a newly developed subtype-selective M4 mAChR antagonist and cell-type specific mAChR knockout (KO) mice to determine the role of M1 and M4 mAChRs in the potentiation of DA release by THP in a KI mouse model of *DYT1-TOR1A* (*Tor1a*<sup>+ΔE</sup>). We found that M4 mAChRs on ChIs mediate the THP-induced increase in striatal DA release in both control (*Tor1a*<sup>+/+</sup>) and *Tor1a*<sup>+ΔE</sup> mice. M1 mAChRs also contribute to the DA-enhancing effects of THP in *Tor1a*<sup>+/+</sup> mice, but not in *Tor1a*<sup>+ΔE</sup> mice. Our results pinpoint a specific cell type and mAChR subtype underlying the effects of THP and also reveal a novel abnormal cholinergic signaling mechanism in *Tor1a*<sup>+ΔE</sup> mice.

## MATERIALS AND METHODS

### *Animals*

Male and female mice (8-14 weeks of age) inbred on C57BL/6J were used for all studies. All mice were bred at Emory University. Animals were maintained on a 12h light/dark cycle and

allowed *ad libitum* access to food and water. All experimental procedures were approved by the Emory Animal Care and Use Committee and followed guidelines set forth in the *Guide for the Care and Use of Laboratory Animals*. Heterozygous knockin mice carrying the *Tor1a*( $\Delta$ gag) mutation (*Tor1a*<sup>+/ $\Delta$ E</sup>) (Goodchild et al., 2005) and normal littermates (*Tor1a*<sup>+/+</sup>) were genotyped using PCR (forward primer 5'-GCTATGGAAGCTCTAGTTGG-3'; reverse primer 5'-CAGCCAGGGCTAAACAGAG-3'). The following strains were used for the conditional mAChR KO mice experiments: M4 mAChR flox (M4<sup>flox/flox</sup>) (Jeon et al., 2010), M1 mAChR flox (M1<sup>flox/flox</sup>) (Kamsler et al., 2010), *ChAT-cre* (ChAT<sup>tm1(cre)/Lowl</sup>/MwarJ; JAX #031661), *D1-cre* (Tg(Drd1-cre)<sup>EY262Gsat</sup>/Mmucd; MMRRC #030989-UCD), and *A2A-cre* (Tg(Adora2a-cre)<sup>KG139Gsat</sup>/Mmucd; MMRRC #036158-UCD). These strains were used to generate both *Tor1a*<sup>+/+</sup> and *Tor1a*<sup>+/ $\Delta$ E</sup> mice with conditional KO of M4 mAChR from cholinergic neurons (ChAT-cre; M4<sup>flox/flox</sup>), KO of M4 mAChR from dSPNs (D1-cre; M4<sup>flox/flox</sup>), KO of M1 mAChR from dSPNs (D1-cre; M1<sup>flox/flox</sup>), and KO of M1 from iSPNs (A2A-cre; M1<sup>flox/flox</sup>). Mice were genotyped using PCR with the following primers *D1-cre* (forward primer 5'- GCTATGGAGATGCTCCTGATGGAA-3'; reverse primer 5'-CGGCAAACGGACAGAAGCATT -3'); *A2A-cre* (forward primer 5'-CGTGAGAAAGCCTTTGGGAAGCT-3'; reverse primer 5'- CGGCAAACGGACAGAAGCATT-3'); *ChAT-cre* (WT forward primer, 5'-GCAAAGAGACCTCATCTGTGGA-3'; cre forward primer, 5'-TTCAGTGCATTCTAGTTGTGGT-3'; common reverse primer, 5'-GATAGGGGAGCAGCACACAG-3'); *M1 flox* (WT forward primer 5'-GAGCCTCAGTTTTCTCATTGG-3'; mutant forward primer 5'- AACACTACTTACACGTGGTGC-3'; common reverse primer 5'- TCAACCTGTACTGGTGATACG-3'); *M4 flox* (forward primer 5'-TGCAGATGTAGCTCAGCTCAGCGGTAC-3'; reverse primer 5'-TGAAGGTTGTAGACAAAGCTATACACATGGC-3').

#### *Fluorescent in situ hybridization*

Brains were rapidly dissected, frozen and kept at -80°C until sectioning (10 µm). RNAscope fluorescent *in situ* hybridization was performed according to manufacturer's instructions (Advanced Cell Diagnostics, Newark, CA, USA). Briefly, slides were fixed in ice-cold 4% paraformaldehyde in 0.1M PBS for 15 mins. Slides were then dehydrated in graded ethanols and allowed to air dry for 5 minutes. Slides were treated with Protease-IV solution for 30 mins at room temperature and then incubated with the appropriate probes for 2 hours at 40 °C. The following probes were used: Mm-*Chat*-C1 (cat # 408731), Mm-*Chrm4*-C2 (cat # 410581-C2), Mm-*Drd1*-C3 (cat # 461901-C3), Mm-*Chrm1*-C1 (cat # 495291), Mm-*Adora2a*-C2 (cat # 409431-C2). A series of four amplification steps were then performed according to manufacturer's instructions with 2 X 2 min washes in wash buffer between each amplification step. Slides were counterstained with DAPI and then coverslipped using Prolong Glass Antifade Mounting media (Thermo Fisher Scientific, Waltham, MA, USA). Slides were stored at 4°C until imaging.

Slides were imaged using a Leica SP8 confocal microscope using Leica Acquisition Suite (LAX S) (Leica Microsystems, Buffalo Grove, IL, USA). A total of 6 regions of interest (ROIs) from the dorsolateral quadrant of the striatum were taken from each section using a 40X or 60X objective and an optical thickness of ~5 µm. The same optical settings were used for image acquisition from each mouse with the settings titrated for each specific probe. Quantification of labeled cells were performed using the Cell Counter function in ImageJ (NIH). Cells were considered positive for a given probe if there were >5 particles clustered around the nucleus.

#### *Fast scan cyclic voltammetry*

Fast scan cyclic voltammetry (FSCV) to measure DA release was performed according to previously published methods (Downs et al., 2019). Mice were euthanized using cervical dislocation and 300 µm sections were prepared using a vibratome in ice-cold oxygenated sucrose-supplemented artificial cerebral spinal fluid (aCSF) containing [in mM]: sucrose [194], NaCl [20], KCl [4.4], CaCl<sub>2</sub> [1.2], MgCl<sub>2</sub> [1.2], NaH<sub>2</sub>PO<sub>4</sub> [1.2], NaHCO<sub>3</sub> [25], D-glucose [11] at pH

7.4. After sectioning, brain slices were maintained in a holding chamber containing oxygenated, bicarbonate-buffered aCSF containing [in mM]: NaCl [126], KCl [2.45], CaCl<sub>2</sub> [2.4], MgCl<sub>2</sub> [1.2], NaH<sub>2</sub>PO<sub>4</sub> [1.2], NaHCO<sub>3</sub> [25], D-glucose [11] and maintained at room temperature for 45-60 min before experiments began.

All FSCV experiments were performed in the dorsolateral striatum at ~ Bregma +0.26 mm because this region receives dense innervation from the motor cortex (Hintiryan et al., 2016). A slice was transferred to the recording chamber and perfused with oxygenated aCSF at 32°C for 30 min to equilibrate to the chamber. A carbon fiber electrode constructed in-house was inserted approximately 50 µm into the surface of the slice and a bipolar tungsten stimulating electrode was placed approximately 200 µm away. DA release was evoked by a 1-pulse (600 µA, 4 ms pulse width) electrical stimulation at 5 min inter-stimulus intervals to prevent rundown. The scan rate for voltammetry was 400 V/s from -0.4 V to 1.3 V to -0.4 V versus Ag/AgCl with a sampling rate of 10 Hz using a Chem-Clamp voltammeter-amperometer (Dagan Corporation, Minneapolis, MN, USA). FSCV experiments were conducted and analyzed using Demon voltammetry software (Wake Forest University) (Yorgason et al., 2011) to determine peak DA release. All compounds were diluted in aCSF at the time of recording and bath applied for 10-20 mins before recordings commenced to allow for equilibration. All electrodes were calibrated to known DA standards in aCSF using a custom-made flow cell.

### *Compounds*

THP was purchased from Sigma-Aldrich (St. Louis, MO). Dihydro-β-erythroidine (DHβE) was obtained from Tocris (Minneapolis, MN). VU6021625 was generously provided by Dr. Jeffrey Conn (Vanderbilt University, TN).

### *Statistical analysis*



All data are presented as means with standard error. Dose response experiments were analyzed with non-linear regression to determine EC<sub>50</sub>. EC<sub>50</sub> was analyzed using a two-tailed Student's *t*-test. Fluorescent *in situ* hybridization data was analyzed using one-way ANOVA with *post hoc* Dunnett's multiple comparison test. Experiments assessing DA release were analyzed using 2-way repeated measures ANOVA (genotype x treatment) with *post hoc* Sidak's multiple comparison test. Analyses were performed separately for *Tor1a*<sup>+/+</sup> and *Tor1a*<sup>+ΔE</sup> in mAChR KO experiments. All analyses were performed using Graphpad Prism 9 (<https://www.graphpad.com/>). Statistical significance is defined as \**p* < 0.05, \*\**p* < 0.01, \*\*\**p* < 0.001, \*\*\*\**p* < 0.0001.

## RESULTS

### *M4 mAChRs in striatal cholinergic cells are necessary for the effects of THP*

We have previously demonstrated that the non-selective mAChR antagonist THP enhances DA release in both *Tor1a*<sup>+/+</sup> and *Tor1a*<sup>+ΔE</sup> KI mice and rescues the deficiency in DA release in *Tor1a*<sup>+ΔE</sup> KI mice (Downs et al., 2019). However, the mAChR subtype(s) and cell types that mediate this effect are unknown. M4 mAChRs expressed on dSPNs, ChIs, and cortical glutamatergic terminals directly or indirectly regulate striatal DA release (Harrison et al., 1996; Threlfell et al., 2010; Threlfell and Cragg, 2011; Pancani et al., 2014). Therefore, to determine if THP depends on M4 mAChRs on any of these cell types, we assessed striatal DA release in response to challenge with THP in *Tor1a*<sup>+/+</sup> and *Tor1a*<sup>+ΔE</sup> KI mice lacking M4 mAChRs on ChIs (ChI-M4<sup>-/-</sup>) or M4 mAChRs on dSPNs (dSPN-M4<sup>-/-</sup>). Deletion of M4 mAChRs from cortical glutamatergic inputs was not investigated because we have previously demonstrated that blocking ionotropic glutamate receptors does not affect the ability of THP to enhance DA release (Downs et al., 2019).

Previous studies have demonstrated that M4 mAChRs on dSPNs regulate striatal DA release by modulating endocannabinoid production (Foster et al., 2016). To test the hypothesis that THP enhances DA release by acting on dSPNs, we measured electrically evoked DA release

in striatal slices from mice lacking M4 mAChRs in direct SPNs (dSPN-M4<sup>-/-</sup>) in the presence of THP (300 nM). The dSPN-M4 KO had no effect on baseline DA release in either *Tor1a*<sup>+/+</sup> mice (Sidak's multiple comparison test,  $p = 0.98$ ) or *Tor1a*<sup>+/ $\Delta$ E</sup> (Sidak's multiple comparison test,  $p = 0.92$ ). Deleting M4 mAChR expression from dSPNs had no effect on the THP-induced increase in DA release in either *Tor1a*<sup>+/+</sup> mice (two-way repeated measures ANOVA main effect of treatment,  $F_{1,9} = 208.2$ ,  $p < 0.0001$ ; treatment x genotype interaction effect,  $F_{1,9} = 2.92$ ,  $p = 0.12$ ) or *Tor1a*<sup>+/ $\Delta$ E</sup> mice (**Fig 1A**, two-way repeated measures ANOVA main effect of treatment,  $F_{1,9} = 17.52$ ,  $p = 0.0024$ ; treatment x genotype interaction effect,  $F_{1,9} = 0.038$ ,  $p = 0.848$ ).

To verify that the M4 mAChR conditional knockout in dSPNs was both effective and cell-type specific, we used fluorescent *in situ* hybridization with probes to *Chrm4*, *Drd1* and *ChAT* to assess striatal mRNA expression. *Chrm4* encodes the M4 mAChR. *Drd1* encodes the D1 DA receptor which is a marker for dSPNs and *ChAT* encodes choline acetyltransferase, a marker for ChIs. In control mice, *Chrm4* mRNA was expressed in all *ChAT*-positive cells and almost all *Drd1*-positive cells. In dSPN-M4<sup>-/-</sup> mice, there was a significant reduction in the percent of cells expressing both *Chrm4* and *Drd1* mRNA to ~13% of control mice while there was a corresponding increase in the percent of cells that expressed only *Drd1* without *Chrm4* (**Fig 1C vs D & Table 1**, one-way ANOVA  $F_{2,6} = 554.7$ ,  $p < 0.0001$ ). There was no change in *Chrm4* mRNA expression in *Chat*-positive striatal ChIs in dSPN-M4<sup>-/-</sup> compared to control mice. These results validate the cell-type specific conditional knockout of M4 mAChRs in dSPNs but not ChIs.

M4 mAChRs are expressed on ChIs where they act as inhibitory autoreceptors. It is known that activation of these autoreceptors results in a reduction in DA release via a decrease in nAChR activation on DA terminals (Threlfell et al., 2010). To test the hypothesis that THP exerts its effect by blocking M4 mAChRs expressed on ChIs, we assessed DA release in striatal slices from mice lacking M4 mAChRs in ChIs (ChI-M4<sup>-/-</sup>). KO of the M4 mAChR from ChIs had no effect on baseline DA release in either *Tor1a*<sup>+/+</sup> (Sidak's multiple comparison test,  $p = 0.81$ ) or *Tor1a*<sup>+/ $\Delta$ E</sup> mice

(Sidak's multiple comparison test,  $p = 0.65$ ). While THP increased DA release in both *Tor1a*<sup>+/+</sup> and *Tor1a*<sup>+/-</sup>; Chl-M4<sup>-/-</sup> mice (**Fig 1B**, two-way repeated measures ANOVA main effect of treatment  $F_{1,10} = 119.7$ ,  $p < 0.0001$ ), the effect of THP was significantly attenuated in *Tor1a*<sup>+/+</sup>; Chl-M4<sup>-/-</sup> mice to 65% of *Tor1a*<sup>+/+</sup> mice (two-way repeated measures ANOVA treatment x genotype interaction effect,  $F_{1,10} = 24.31$ ,  $p = 0.0006$ , Sidak's multiple comparison test,  $p = 0.35$ ). In *Tor1a*<sup>+ΔE</sup> mice, THP significantly increased DA release (two-way repeated measures ANOVA, main effect of treatment,  $F_{1,10} = 10.58$ ,  $p = 0.0087$ ; treatment x genotype interaction effect  $F_{1,10} = 2.89$ ,  $p = 0.12$ ). However, THP did not significantly enhance DA release in *Tor1a*<sup>+ΔE</sup>; Chl-M4<sup>-/-</sup> mice (Sidak's multiple comparisons test,  $p = 0.51$ ). These results suggest that M4 mAChRs on ChIs mediate the effects of THP in *Tor1a*<sup>+ΔE</sup> KI mice. However, in *Tor1a*<sup>+/+</sup> mice, the effects of THP are mediated only in part by M4 mAChR on ChIs.

Fluorescent *in situ* hybridization with probes to *Chrm4*, *Drd1* and *ChAT* was used to verify that the M4 mAChR conditional knockout in ChIs was accomplished. In control mice, *Chrm4* mRNA was detected in all *ChAT*-positive cells. However, in Chl-M4<sup>-/-</sup> mice, *Chrm4* mRNA expression was not detected in any *ChAT*-positive cells (**Fig 1C vs E & Table 1**, one-way ANOVA  $F_{2,6} = 18.68$ ,  $p = 0.0002$ ). There was no change in *Chrm4* mRNA expression in *Drd1*-positive cells in Chl-M4<sup>-/-</sup> compared to control mice. Thus, the conditional *Chrm4* deletion targeted to ChIs was cell-type specific and highly effective.

#### *A selective M4 mAChR antagonist is sufficient to recapitulate the effects of THP*

The cell-type selective KO experiments suggest that M4 mAChRs are necessary for the DA release-enhancing effects of THP in *Tor1a*<sup>+ΔE</sup> KI mice. However, because THP acts at all five mAChRs, it is not clear if selective blockade of M4 mAChRs would rescue DA release in *Tor1a*<sup>+ΔE</sup> KI mice similar to the effects of THP. Therefore, we assessed DA release in the presence of the subtype-selective M4 mAChR antagonist VU6021625, which was shown to be effective in ameliorating the dystonia exhibited by a mouse model of DOPA-response dystonia (Moehle et

al., 2020). VU6021625 dose-dependently enhanced DA release in both *Tor1a*<sup>+/+</sup> and *Tor1a*<sup>+ΔE</sup> KI mice (**Fig 2A**). There was no significant difference in EC<sub>50</sub> between genotypes (Student's *t*-test, *p* = 0.87). DA release was significantly increased in both *Tor1a*<sup>+/+</sup> and *Tor1a*<sup>+ΔE</sup> KI mice at the maximal concentration of 300nM VU6021625 (**Fig 2B**, two-way repeated measures ANOVA, main effect of treatment, *F*<sub>1,8</sub> = 30.19, *p* < 0.0006). VU6021625 was similarly effective in both *Tor1a*<sup>+/+</sup> and *Tor1a*<sup>+ΔE</sup> KI mice (two-way repeated measures ANOVA genotype x treatment interaction effect, *F*<sub>1,8</sub> = 1.376, *p* = 0.27). Importantly, VU6021625 normalized DA release in *Tor1a*<sup>+ΔE</sup> KI mice to *Tor1a*<sup>+/+</sup> levels (Sidak's multiple comparison's test, *p* = 0.58).

#### *Blockade of M4 mAChRs in ChIs but not dSPNs recapitulates the effects of THP*

To determine the specific cell type(s) that mediate the effects of the M4 mAChR subtype-selective antagonist, we assessed DA release in response to VU6021625 (300 nM) in dSPN-M4<sup>-/-</sup> mice. Deleting M4 mAChR expression from dSPNs had no effect on the VU6021625-induced increase in DA release in *Tor1a*<sup>+/+</sup> (two-way repeated measures ANOVA main effect of treatment *F*<sub>1,8</sub> = 36.15, *p* = 0.0003; treatment x genotype interaction effect, *F*<sub>1,8</sub> = 0.00024, *p* = 0.99) or *Tor1a*<sup>+ΔE</sup> dSPN-M4<sup>-/-</sup> mice (**Fig 3A**, two-way repeated measures ANOVA main effect of treatment *F*<sub>1,8</sub> = 242.2, *p* < 0.0001; treatment x genotype interaction effect, *F*<sub>1,8</sub> = 0.578, *p* = 0.47).

Next, we determined the role of M4 mAChR expressed on ChIs in mediating the increase in DA release in response to VU6021625 treatment. KO of M4 mAChR from ChIs eliminated the DA enhancing effect of VU6021625 in *Tor1a*<sup>+/+</sup> mice (**Fig 3B**, two-way repeated measures ANOVA, treatment x genotype interaction effect, *F*<sub>1,9</sub> = 9.81, *p* = 0.012). KO of M4 mAChR from cholinergic neurons also eliminated the DA enhancing effect of VU6021625 in *Tor1a*<sup>+ΔE</sup> KI mice (two-way repeated measures ANOVA, treatment x genotype interaction effect, *F*<sub>1,9</sub> = 51.46, *p* < 0.0001). These data suggest that the M4 subtype selective mAChR antagonist enhances DA release by blocking M4 mAChR on ChIs in both *Tor1a*<sup>+/+</sup> and *Tor1a*<sup>+ΔE</sup> KI mice.

# *M1 mAChRs on dSPNs and iSPNs are required for the effects of THP in $Tor1a^{+/+}$ but not $Tor1a^{+/\Delta E}$ KI mice*

M1 mAChRs are expressed on both direct and indirect SPNs (Harrison et al., 1996; Hernandez-Flores et al., 2015). Previous studies have demonstrated that M1 mAChR regulates extracellular DA in mice (Gerber et al., 2001). Although the mechanism mediating this effect is largely unknown, it is known that SPNs provide GABAergic input to ChIs (Tepper et al., 2008). It is possible that THP mediates DA release indirectly by blocking excitatory M1 mAChRs on SPNs to disinhibit ChI activity thereby increasing ACh release and nAChR activity on DA terminals. To determine if M1 mAChRs on either direct or indirect SPNs are required for the DA release-enhancing effects of THP, we assessed striatal DA release in response to challenge with THP in  $Tor1a^{+/+}$  and  $Tor1a^{+/\Delta E}$  KI mice lacking M1 mAChR on dSPNs (dSPN-M1<sup>-/-</sup>) or iSPNs (iSPN-M1<sup>-/-</sup>).

In  $Tor1a^{+/+}$  mice lacking M1 mAChR in dSPNs, the increase in DA release in response to THP was diminished compared to control animals (**Fig 4A**, two-way repeated measures ANOVA treatment x genotype interaction effect,  $F_{1,10} = 8.226$ ,  $p = 0.016$ ). However, THP still significantly increased DA release in  $Tor1a^{+/+}$  dSPN-M1<sup>-/-</sup> mice (two-way repeated measures ANOVA treatment effect,  $F_{1,10} = 109.1$ ,  $p < 0.0001$ , Sidak multiple comparisons test,  $p = 0.0006$ ). In contrast, KO of M1 mAChR from dSPNs did not affect the response to THP in  $Tor1a^{+/\Delta E}$  KI mice (two-way repeated measures ANOVA treatment x genotype interaction effect  $F_{1,10} = 0.128$ ,  $p = 0.73$ ). There were no differences observed in baseline DA release in either  $Tor1a^{+/+}$  (Sidak's multiple comparison test,  $p = 0.90$ ) or  $Tor1a^{+/\Delta E}$  (Sidak's multiple comparison test,  $p = 0.83$ ) due to dSPN-M1 KO.

In  $Tor1a^{+/+}$  mice lacking M1 mAChR in iSPNs, THP significantly increased DA release, but the effect was significantly diminished compared to  $Tor1a^{+/+}$ , similar to  $Tor1a^{+/+}$  dSPN-M1<sup>-/-</sup> mice (**Fig 4B**, two-way repeated measures ANOVA treatment x genotype interaction effect,  $F_{1,10} = 9.455$ ,  $p = 0.012$ , Sidak multiple comparisons test,  $p = 0.0003$ ). In contrast, the effect of THP in

*Tor1a*<sup>+ΔE</sup> iSPN-M1<sup>-/-</sup> mice did not differ from *Tor1a*<sup>+ΔE</sup> mice (two-way repeated measures ANOVA treatment x genotype interaction effect  $F_{1,10} = 0.6647$ ,  $p = 0.43$ ). Deletion of M1 mAChRs from iSPNs had no effect on baseline release in either *Tor1a*<sup>+/-</sup> (Sidak's multiple comparison test,  $p = 0.89$ ) or *Tor1a*<sup>+ΔE</sup> (Sidak's multiple comparison test,  $p = 0.92$ ). These results demonstrate that M1 mAChRs contribute to the effects of THP on DA release in *Tor1a*<sup>+/-</sup> but not *Tor1a*<sup>+ΔE</sup> KI mice.

To confirm that the SPN cell-type specific KO of M1 mAChRs were effective, we used fluorescent *in situ* hybridization with probes specific to *Chrm1*, *Adora2a*, and *Drd1*. *Chrm1* encodes the M1 mAChR receptor. *Adora2a* encodes the A2A adenosine receptor and is a specific marker for iSPNs. *Drd1* is a specific marker for dSPNs. In control mice, *Chrm1* was expressed in almost all *Adora2a*-positive and *Drd1*-positive cells. However, in dSPN-M1<sup>-/-</sup> mice, the percentage of cells expressing both *Chrm1* and *Drd1* mRNA was significantly reduced to ~2% of control levels (**Fig 4C vs D & Table 2**, one-way ANOVA  $F_{2,6} = 90.44$ ,  $p < 0.0001$ ) while the percentage of cells expressing both *Chrm1* and *Adora2a* was unchanged. In iSPN-M1<sup>-/-</sup> mice, the percentage of cells expressing both *Chrm1* and *Adora2a* mRNA was significantly reduced to ~5% of control levels (**Fig 4C vs E & Table 2**, one-way ANOVA  $F_{2,6} = 57.37$ ,  $p < 0.0001$ ), while the percentage of cells expressing both *Chrm1* and *Drd1* mRNA was unchanged. These results demonstrate that the M1 mAChR knockouts were specific and effective.

## DISCUSSION

THP is the only oral medication to be proven effective in a double-blind placebo-controlled trial for dystonia (Fahn, 1983; Burke et al., 1986). Unfortunately, most patients cannot use THP due to intolerable side-effects at the high doses necessary for efficacy in dystonia (Schwarz and Bressman, 2009; Thenganatt and Jankovic, 2014). Here we used THP as a platform to further understand the mechanism of action of mAChR antagonists and identify specific mAChR subtypes that may serve as targets for more efficacious therapeutics with fewer side effects. We demonstrated that M4 mAChR located on striatal ChIs mediate the THP-induced increase in striatal DA release. Furthermore, we described a role for M1 mAChR in the increase in striatal DA release caused by THP in *Tor1a*<sup>+/+</sup> mice, but not in *Tor1a*<sup>+ΔE</sup> KI mice.

Our results demonstrate that M4 mAChRs expressed on ChIs are both necessary and sufficient for the THP-induced rescue of DA release in *Tor1a*<sup>+ΔE</sup> KI mice. KO of M4 mAChR from ChIs, but not dSPNs, abolished the increase in DA release caused by THP in *Tor1a*<sup>+ΔE</sup> KI mice, while a selective M4 mAChR antagonist recapitulated the effect of THP. KO of M4 mAChR from ChIs abolished the ability of the M4 subtype selective mAChR antagonist VU6021625 to enhance DA release in both *Tor1a*<sup>+/+</sup> and *Tor1a*<sup>+ΔE</sup> KI mice, which demonstrates the receptor specificity of the compound. The results from the antagonist experiments are also notable because gene deletion experiments can be confounded by compensatory developmental changes in response to the knockout. The consistency of our results across both the M4 mAChR antagonist challenge in genetically unaltered adult mice and the conditional knockout experiments suggests that developmental confounds do not likely account for the results.

While our results implicate M4 mAChRs on ChIs in the action of THP, the conditional knockout used here was not specific to ChIs and it is likely that M4 mAChR expression was deleted from other cholinergic projections to the striatum, including projections from the pedunculo pontine nucleus and laterodorsal tegmentum (Dautan et al., 2016). However, a recent



study found these brainstem cholinergic projections do not play a role in mediating striatal DA release in this *ex vivo* slice preparation (Brimblecombe et al., 2018). Further, both M2 and M4 mAChRs act as autoreceptors on ChIs to mediate DA release (Smiley et al., 1999; Threlfell et al., 2010). While we did not specifically address the contribution of M2 mAChRs, the near total abolition of DA release enhancement by THP after M4 mAChR KO from ChIs in *Tor1a<sup>+ΔE</sup>* KI mice suggests that M2 mAChRs play a minor role, if any. Thus, while other cell types and receptors may play a role in the mechanism of action of THP in DA release, our results suggest that M4 mAChRs on ChIs play a dominant role.

The role of ChIs in the mechanism of action of THP is consistent with the considerable evidence implicating ChI dysfunction in *DYT1-TOR1A* dystonia. Normally, D2R activation inhibits ChI firing rates, causing a reduction in extracellular ACh. In contrast, in *Tor1a(ΔE)* rodent models, the D2R agonist quinpirole induces an increase in the ChI firing rate (Pisani et al., 2006; Martella et al., 2009; Grundmann et al., 2012; Sciamanna et al., 2012). Both THP and a more selective M2/M4 mAChR antagonist restore D2R-mediated ChI responses in *ex vivo* brain slices of *Tor1a<sup>+ΔE</sup>* KI mice (Scarduzio et al., 2017). Thus, THP and other more selective mAChR antagonists normalize both DA release and striatal ChI responses in *Tor1a<sup>+ΔE</sup>* KI mice suggesting a central role for ChI in the development of novel therapeutics. However, it is not yet known if a selective M4 mAChR antagonist alone would similarly normalize ChI responses.

Our studies suggest that M1 mAChR function is abnormal in *Tor1a<sup>+ΔE</sup>* KI mice. Consistent with previous work (Gerber et al., 2001), we demonstrate that M1 mAChRs mediate DA release in normal mice, as KO of M1 mAChR from either dSPNs or iSPNs attenuated the DA release-enhancing effects of THP. While the precise mechanisms that mediate this effect are unclear, it is likely indirect perhaps via SPN axon collateral synapses onto ChIs (Tepper et al., 2008). In contrast to normal mice, the response to THP in *Tor1a<sup>+ΔE</sup>* KI mice was not affected by deletion of M1 mAChRs suggesting either hypofunctional M1 mAChR signaling on dSPNs and iSPNs or a



defect in the local striatal microcircuit in *Tor1a*<sup>+ΔE</sup> KI mice. As previous studies have not identified changes in M1 mAChR expression levels in *Tor1a*<sup>+ΔE</sup> KI mice (Richter et al., 2019) and M1 mAChR function appears to be normal in *Tor1a*<sup>+ΔE</sup> KI mice (Martella et al., 2014), a local microcircuit defect seems to be the most likely explanation and future experiments will be required to address this question. Although M1 mAChRs do not contribute to the THP-induced normalization of DA release in *Tor1a*<sup>+ΔE</sup> KI mice, the action of THP via M1 mAChRs rescues the abnormal corticostriatal plasticity, including diminished long-term depression and loss of synaptic depotentiation in SPNs, observed in *Tor1a*<sup>+ΔE</sup> KI mice (Maltese et al., 2014; Martella et al., 2014). Thus, a combination of M1 and M4 antagonists may be required to simultaneously enhance striatal DA while also restoring normal corticostriatal plasticity to effectively treat dystonia.

Taken together, our data demonstrate that THP normalizes DA release in *Tor1a*<sup>+ΔE</sup> KI mice by blocking M4 mAChR on ChIs. This suggests that M4 subtype-selective mAChR antagonists, alone or in combination with other compounds, may be promising therapeutics for *DYT1-TOR1A* dystonia. Further, because many of the dose-limiting peripheral side effects associated with THP, including constipation, dry mouth, and urinary retention, are mediated by M2 and M3 mAChR (Bymaster et al., 2003), M4 subtype-selective mAChR antagonists may improve dystonia symptoms while avoiding many of the side effects of the non-selective mAChR antagonists that are currently available to patients. Indeed a recent study demonstrating that the M4 mAChR subtype-selective antagonist VU6021625 reduces dystonic movements in a knockin mouse model of DOPA-responsive dystonia provides support for this approach (Moehle et al., 2020). That VU6021625 ameliorates the abnormal phenotypes in two different mouse models of dystonia demonstrates the promise of more selective mAChR antagonists as therapeutics for dystonia.

## REFERENCES

- Alcantara AA, Mrzljak L, Jakab RL, Levey AI, Hersch SM, Goldman-Rakic PS (2001) Muscarinic m1 and m2 receptor proteins in local circuit and projection neurons of the primate striatum: anatomical evidence for cholinergic modulation of glutamatergic prefronto-striatal pathways. *The Journal of comparative neurology* 434:445-460.
- Asanuma K, Ma Y, Okulski J, Dhawan V, Chaly T, Carbon M, Bressman SB, Eidelberg D (2005) Decreased striatal D2 receptor binding in non-manifesting carriers of the DYT1 dystonia mutation. *Neurology* 64:347-349.
- Augood SJ, Hollingsworth Z, Albers DS, Yang L, Leung J, Breakefield XO, Standaert DG (2004) Dopamine transmission in DYT1 dystonia. *Advances in neurology* 94:53-60.
- Balcioglu A, Kim MO, Sharma N, Cha JH, Breakefield XO, Standaert DG (2007) Dopamine release is impaired in a mouse model of DYT1 dystonia. *Journal of neurochemistry* 102:783-788.
- Bolden C, Cusack B, Richelson E (1992) Antagonism by antimuscarinic and neuroleptic compounds at the five cloned human muscarinic cholinergic receptors expressed in Chinese hamster ovary cells. *The Journal of pharmacology and experimental therapeutics* 260:576-580.
- Brimblecombe KR, Threlfell S, Dautan D, Kosillo P, Mena-Segovia J, Cragg SJ (2018) Targeted Activation of Cholinergic Interneurons Accounts for the Modulation of Dopamine by Striatal Nicotinic Receptors. *eNeuro* 5.

Buckley NJ, Bonner TI, Brann MR (1988) Localization of a family of muscarinic receptor mRNAs in rat brain. *The Journal of neuroscience : the official journal of the Society for Neuroscience* 8:4646-4652.

Burke RE, Fahn S, Marsden CD (1986) Torsion dystonia: a double-blind, prospective trial of high-dosage trihexyphenidyl. *Neurology* 36:160-164.

Bymaster FP, Carter PA, Yamada M, Gomeza J, Wess J, Hamilton SE, Nathanson NM, McKinzie DL, Felder CC (2003) Role of specific muscarinic receptor subtypes in cholinergic parasympathomimetic responses, in vivo phosphoinositide hydrolysis, and pilocarpine-induced seizure activity. *The European journal of neuroscience* 17:1403-1410.

Dautan D, Hacıoglu Bay H, Bolam JP, Gerdjikov TV, Mena-Segovia J (2016) Extrinsic Sources of Cholinergic Innervation of the Striatal Complex: A Whole-Brain Mapping Analysis. *Frontiers in neuroanatomy* 10:1.

Dorje F, Wess J, Lambrecht G, Tacke R, Mutschler E, Brann MR (1991) Antagonist binding profiles of five cloned human muscarinic receptor subtypes. *The Journal of pharmacology and experimental therapeutics* 256:727-733.

Downs AM, Fan X, Donsante C, Jinnah HA, Hess EJ (2019) Trihexyphenidyl rescues the deficit in dopamine neurotransmission in a mouse model of DYT1 dystonia. *Neurobiology of disease* 125:115-122.

Exley R, Cragg SJ (2008) Presynaptic nicotinic receptors: a dynamic and diverse cholinergic filter of striatal dopamine neurotransmission. *British journal of pharmacology* 153 Suppl 1:S283-297.

Fahn S (1983) High-dosage anticholinergic therapy in dystonia. *Advances in neurology* 37:177-188.

Foster DJ, Wilson JM, Remke DH, Mahmood MS, Uddin MJ, Wess J, Patel S, Marnett LJ, Niswender CM, Jones CK, Xiang Z, Lindsley CW, Rook JM, Conn PJ (2016) Antipsychotic-like Effects of M4 Positive Allosteric Modulators Are Mediated by CB2 Receptor-Dependent Inhibition of Dopamine Release. *Neuron* 91:1244-1252.

Gerber DJ, Sotnikova TD, Gainetdinov RR, Huang SY, Caron MG, Tonegawa S (2001) Hyperactivity, elevated dopaminergic transmission, and response to amphetamine in M1 muscarinic acetylcholine receptor-deficient mice. *Proceedings of the National Academy of Sciences* 98:15312-15317.

Goodchild RE, Kim CE, Dauer WT (2005) Loss of the dystonia-associated protein torsinA selectively disrupts the neuronal nuclear envelope. *Neuron* 48:923-932.

Grundmann K, Glöckle N, Martella G, Sciamanna G, Hauser TK, Yu L, Castaneda S, Pichler B, Fehrenbacher B, Schaller M, Nuscher B, Haass C, Hettich J, Yue Z, Nguyen HP, Pisani A, Riess O, Ott T (2012) Generation of a novel rodent model for DYT1 dystonia. *Neurobiology of disease* 47:61-74.

Guthrie SK, Manzey L, Scott D, Giordani B, Tandon R (2000) Comparison of central and peripheral pharmacologic effects of biperiden and trihexyphenidyl in human volunteers. *Journal of clinical psychopharmacology* 20:77-83.

Harrison MB, Tissot M, Wiley RG (1996) Expression of m1 and m4 muscarinic receptor mRNA in the striatum following a selective lesion of striatonigral neurons. *Brain research* 734:323-326.

Hernandez-Flores T, Hernandez-Gonzalez O, Perez-Ramirez MB, Lara-Gonzalez E, Arias-Garcia MA, Duhne M, Perez-Burgos A, Prieto GA, Figueroa A, Galarraga E, Bargas J (2015) Modulation of direct pathway striatal projection neurons by muscarinic M(4)-type receptors. *Neuropharmacology* 89:232-244.

Hintiryan H, Foster NN, Bowman I, Bay M, Song MY, Gou L, Yamashita S, Bienkowski MS, Zingg B, Zhu M, Yang XW, Shih JC, Toga AW, Dong HW (2016) The mouse cortico-striatal projectome. *Nature neuroscience* 19:1100-1114.

Jabbari B, Scherokman B, Gunderson CH, Rosenberg ML, Miller J (1989) Treatment of movement disorders with trihexyphenidyl. *Movement disorders : official journal of the Movement Disorder Society* 4:202-212.

Jeon J, Dencker D, Wörtwein G, Woldbye DP, Cui Y, Davis AA, Levey AI, Schütz G, Sager TN, Mørk A, Li C, Deng CX, Fink-Jensen A, Wess J (2010) A subpopulation of neuronal M4 muscarinic acetylcholine receptors plays a critical role in modulating dopamine-dependent behaviors. *The Journal of neuroscience : the official journal of the Society for Neuroscience* 30:2396-2405.

Kamsler A, McHugh TJ, Gerber D, Huang SY, Tonegawa S (2010) Presynaptic m1 muscarinic receptors are necessary for mGluR long-term depression in the hippocampus. *Proceedings of the National Academy of Sciences of the United States of America* 107:1618-1623.

Levey AI (1993) Immunological localization of m1-m5 muscarinic acetylcholine receptors in peripheral tissues and brain. *Life sciences* 52:441-448.

Levey AI, Kitt CA, Simonds WF, Price DL, Brann MR (1991) Identification and localization of muscarinic acetylcholine receptor proteins in brain with subtype-specific antibodies. *The*

Journal of neuroscience : the official journal of the Society for Neuroscience 11:3218-3226.

Lumsden DE, Kaminska M, Tomlin S, Lin JP (2016) Medication use in childhood dystonia.

European journal of paediatric neurology : EJPN : official journal of the European Paediatric Neurology Society 20:625-629.

Maltese M, Martella G, Madeo G, Fagiolo I, Tassone A, Ponterio G, Sciamanna G, Burbaud P, Conn PJ, Bonsi P, Pisani A (2014) Anticholinergic drugs rescue synaptic plasticity in DYT1 dystonia: role of M1 muscarinic receptors. Movement disorders : official journal of the Movement Disorder Society 29:1655-1665.

Martella G, Maltese M, Nistico R, Schirizzi T, Madeo G, Sciamanna G, Ponterio G, Tassone A, Mandolesi G, Vanni V, Pignatelli M, Bonsi P, Pisani A (2014) Regional specificity of synaptic plasticity deficits in a knock-in mouse model of DYT1 dystonia. Neurobiology of disease 65:124-132.

Martella G, Tassone A, Sciamanna G, Platania P, Cuomo D, Viscomi MT, Bonsi P, Cacci E, Biagioni S, Usiello A, Bernardi G, Sharma N, Standaert DG, Pisani A (2009) Impairment of bidirectional synaptic plasticity in the striatum of a mouse model of DYT1 dystonia: role of endogenous acetylcholine. Brain : a journal of neurology 132:2336-2349.

Moehle MS, Bender AM, Dickerson JW, Foster DJ, Donsante Y, Peng W, Bryant Z, Bridges TM, Chang S, Watson KJ, O'Neill JC, Engers JL, Peng L, Rodriguez AL, Niswender CM, Lindsley CW, Hess EJ, Conn PJ, Rook JM (2020) Discovery of the first selective M<sub>4</sub> muscarinic acetylcholine receptor antagonists with *in vivo* anti-parkinsonian and anti-dystonic efficacy. bioRxiv:2020.2010.2012.324152.

Nair AG, Gutierrez-Arenas O, Eriksson O, Vincent P, Hellgren Kotaleski J (2015) Sensing Positive versus Negative Reward Signals through Adenylyl Cyclase-Coupled GPCRs in Direct and Indirect Pathway Striatal Medium Spiny Neurons. *The Journal of neuroscience : the official journal of the Society for Neuroscience* 35:14017-14030.

Nair AG, Castro LRV, El Khoury M, Gorgievski V, Giros B, Tzavara ET, Hellgren-Kotaleski J, Vincent P (2019) The high efficacy of muscarinic M4 receptor in D1 medium spiny neurons reverses striatal hyperdopaminergia. *Neuropharmacology* 146:74-83.

Ozelius LJ, Kramer PL, de Leon D, Risch N, Bressman SB, Schuback DE, Brin MF, Kwiatkowski DJ, Burke RE, Gusella JF, et al. (1992) Strong allelic association between the torsion dystonia gene (DYT1) and loci on chromosome 9q34 in Ashkenazi Jews. *American journal of human genetics* 50:619-628.

Ozelius LJ, Hewett JW, Page CE, Bressman SB, Kramer PL, Shalish C, de Leon D, Brin MF, Raymond D, Corey DP, Fahn S, Risch NJ, Buckler AJ, Gusella JF, Breakefield XO (1997) The early-onset torsion dystonia gene (DYT1) encodes an ATP-binding protein. *Nature genetics* 17:40-48.

Page ME, Bao L, Andre P, Pelta-Heller J, Sluzas E, Gonzalez-Alegre P, Bogush A, Khan LE, Iacovitti L, Rice ME, Ehrlich ME (2010) Cell-autonomous alteration of dopaminergic transmission by wild type and mutant (DeltaE) TorsinA in transgenic mice. *Neurobiology of disease* 39:318-326.

Pancani T, Bolarinwa C, Smith Y, Lindsley CW, Conn PJ, Xiang Z (2014) M4 mAChR-mediated modulation of glutamatergic transmission at corticostriatal synapses. *ACS chemical neuroscience* 5:318-324.

Pisani A, Martella G, Tscherter A, Bonsi P, Sharma N, Bernardi G, Standaert DG (2006) Altered responses to dopaminergic D2 receptor activation and N-type calcium currents in striatal cholinergic interneurons in a mouse model of DYT1 dystonia. *Neurobiology of disease* 24:318-325.

Richter F, Klein L, Helmschrodt C, Richter A (2019) Subtle changes in striatal muscarinic M1 and M4 receptor expression in the DYT1 knock-in mouse model of dystonia. *PloS one* 14:e0226080.

Scarduzio M, Zimmerman CN, Jaunarajs KL, Wang Q, Standaert DG, McMahon LL (2017) Strength of cholinergic tone dictates the polarity of dopamine D2 receptor modulation of striatal cholinergic interneuron excitability in DYT1 dystonia. *Experimental neurology* 295:162-175.

Schwarz CS, Bressman SB (2009) Genetics and treatment of dystonia. *Neurologic clinics* 27:697-718, vi.

Sciamanna G, Tassone A, Mandolesi G, Puglisi F, Ponterio G, Martella G, Madeo G, Bernardi G, Standaert DG, Bonsi P, Pisani A (2012) Cholinergic dysfunction alters synaptic integration between thalamostriatal and corticostriatal inputs in DYT1 dystonia. *The Journal of neuroscience : the official journal of the Society for Neuroscience* 32:11991-12004.

Smiley JF, Levey AI, Mesulam MM (1999) m2 muscarinic receptor immunolocalization in cholinergic cells of the monkey basal forebrain and striatum. *Neuroscience* 90:803-814.

Song CH, Fan X, Exeter CJ, Hess EJ, Jinnah HA (2012) Functional analysis of dopaminergic systems in a DYT1 knock-in mouse model of dystonia. *Neurobiology of disease* 48:66-78.



Tepper JM, Wilson CJ, Koos T (2008) Feedforward and feedback inhibition in neostriatal GABAergic spiny neurons. *Brain research reviews* 58:272-281.

Thenganatt MA, Jankovic J (2014) Treatment of dystonia. *Neurotherapeutics : the journal of the American Society for Experimental NeuroTherapeutics* 11:139-152.

Threlfell S, Cragg SJ (2011) Dopamine signaling in dorsal versus ventral striatum: the dynamic role of cholinergic interneurons. *Frontiers in systems neuroscience* 5:11.

Threlfell S, Clements MA, Khodai T, Pienaar IS, Exley R, Wess J, Cragg SJ (2010) Striatal muscarinic receptors promote activity dependence of dopamine transmission via distinct receptor subtypes on cholinergic interneurons in ventral versus dorsal striatum. *The Journal of neuroscience : the official journal of the Society for Neuroscience* 30:3398-3408.

Yamada M, Basile AS, Fedorova I, Zhang W, Duttaroy A, Cui Y, Lamping KG, Faraci FM, Deng CX, Wess J (2003) Novel insights into M5 muscarinic acetylcholine receptor function by the use of gene targeting technology. *Life sciences* 74:345-353.

Yorgason JT, Espana RA, Jones SR (2011) Demon voltammetry and analysis software: analysis of cocaine-induced alterations in dopamine signaling using multiple kinetic measures. *Journal of neuroscience methods* 202:158-164.

Zhang L, Doyon WM, Clark JJ, Phillips PE, Dani JA (2009a) Controls of tonic and phasic dopamine transmission in the dorsal and ventral striatum. *Molecular pharmacology* 76:396-404.

Zhang T, Zhang L, Liang Y, Siapas AG, Zhou FM, Dani JA (2009b) Dopamine signaling differences in the nucleus accumbens and dorsal striatum exploited by nicotine. *The*

Journal of neuroscience : the official journal of the Society for Neuroscience 29:4035-4043.

Zhang W, Yamada M, Gomeza J, Basile AS, Wess J (2002a) Multiple muscarinic acetylcholine receptor subtypes modulate striatal dopamine release, as studied with M1-M5 muscarinic receptor knock-out mice. The Journal of neuroscience : the official journal of the Society for Neuroscience 22:6347-6352.

Zhang W, Basile AS, Gomeza J, Volpicelli LA, Levey AI, Wess J (2002b) Characterization of central inhibitory muscarinic autoreceptors by the use of muscarinic acetylcholine receptor knock-out mice. The Journal of neuroscience : the official journal of the Society for Neuroscience 22:1709-1717.

## FIGURE LEGENDS

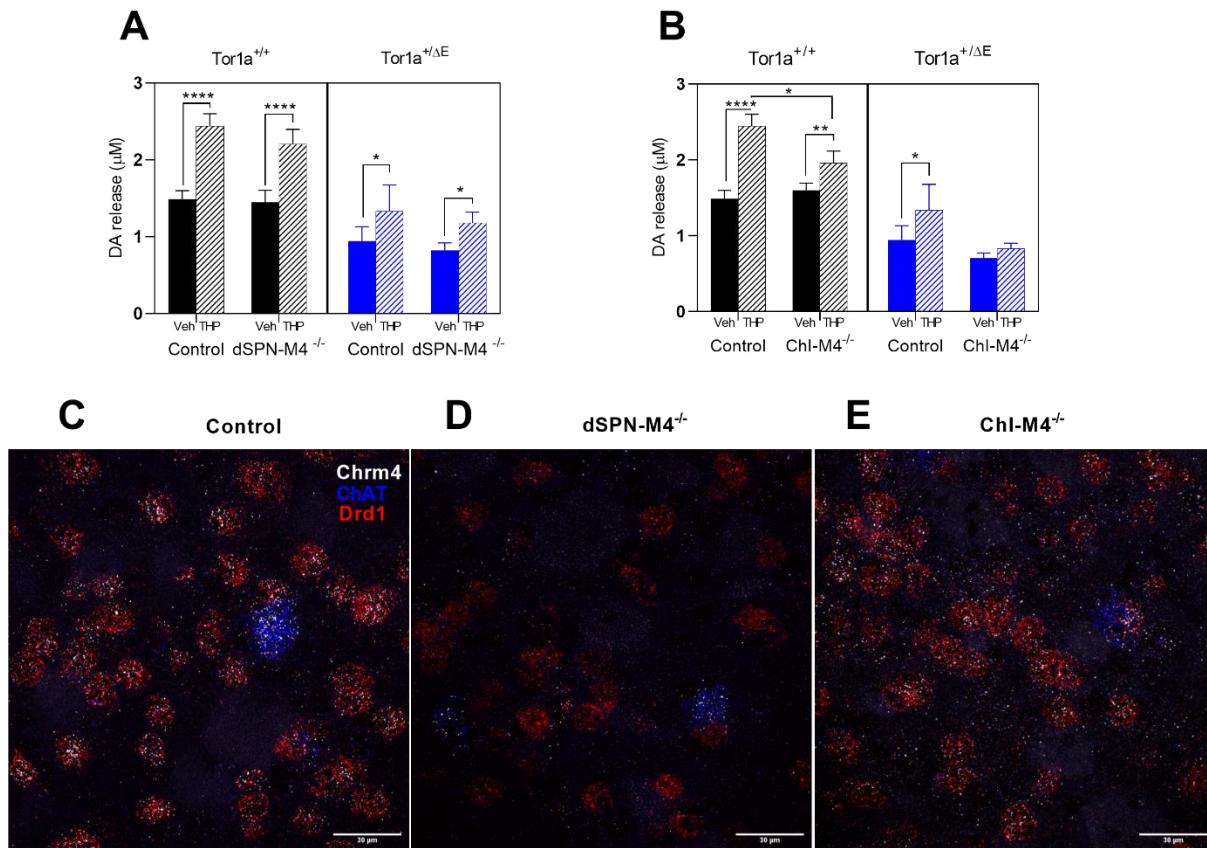

**Fig 1. Effect of cell-type specific deletion of M4 mAChRs on striatal DA release in *Tor1a*<sup>+/+</sup> and *Tor1a*<sup>+/ΔE</sup> KI mice** (A) KO of M4 mAChR from direct SPNs did not significantly change the DA-release enhancing effects of 300nM THP in either genotype. (B) In *Tor1a*<sup>+/+</sup> mice, deletion of M4 mAChR from Chls reduced the effect of THP relative to controls. KO of M4 mAChR from Chls abolished the effects of THP in *Tor1a*<sup>+/ΔE</sup>. Data are expressed as mean peak concentration of DA released (μM) ± SEM (all groups n=6); \*p<0.05, \*\*p<0.01, \*\*\*\*p<0.0001. Representative images of fluorescent *in situ* hybridization in control (C), dSPN-M4<sup>-/-</sup> (D), and Chl-M4<sup>-/-</sup> (E) mice using probes to ChAT, Chrm4, and Drd1 mRNA.

| Table 1.               |                                 | M4 mAChR KO mouse validation |                                 |                        |
|------------------------|---------------------------------|------------------------------|---------------------------------|------------------------|
|                        |                                 | <i>Cell markers</i>          |                                 |                        |
| Genotype               | <i>ChAT+</i> ,<br><i>Chrm4+</i> | <i>ChAT+</i>                 | <i>Drd1+</i> ,<br><i>Chrm4+</i> | <i>Drd1+</i>           |
| WT                     | 6.2±0.4%<br>(21)                | 0.0±0.0%<br>(0)              | 92.9±1.2%<br>(314)              | 0.9±0.8%<br>(3)        |
| dSPN-M4 <sup>-/-</sup> | 7.3±1.8%<br>(27)                | 0.0±0.0%<br>(0)              | 12.1±1.9%****<br>(45)           | 80.7±2.9%****<br>(290) |
| ChI-M4 <sup>-/-</sup>  | 0.0±0.0%**<br>(0)               | 6.6±0.9%***<br>(25)          | 92.9±1.1%<br>(344)              | 0.5±0.3%<br>(2)        |

Table 1. **M4 mAChR KO mouse validation.** Quantification of *Chat*- *Drd1*- and *Chrm4*-positive cells in M4 mAChR cell-type specific knockout mice. Data represent mean percentage ± SEM of positive cells with the number of cells in parentheses. Data within each column were analyzed with one-way ANOVA with *post hoc* Dunnett's multiple comparisons test. \*\*p < 0.01, \*\*\* p < 0.001, \*\*\*\* p < 0.0001 compared to control.

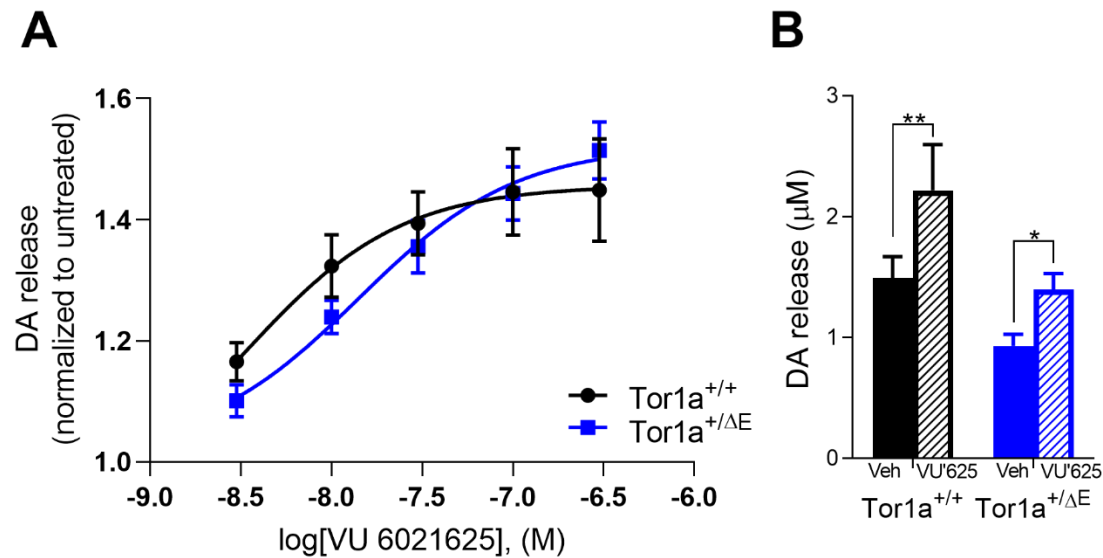

**Fig 2. Effect of VU6021625 on striatal DA release in *Tor1a*<sup>+/+</sup> and *Tor1a*<sup>+/ΔE</sup> KI mice.** (A) Dose response curve of the effect of the subtype-selective M4 mAChR antagonist VU6021625 on DA release. VU6021625 dose-dependently enhanced DA release in both *Tor1a*<sup>+/+</sup> and *Tor1a*<sup>+/ΔE</sup> KI mice. Values are normalized to untreated for each genotype. (B) Effect of maximal concentration of VU6021625 on DA release. 300nM VU6021625 significantly enhanced striatal DA release in both *Tor1a*<sup>+/+</sup> and *Tor1a*<sup>+/ΔE</sup> KI mice. Values represent mean ± SEM (n=5); \*p<0.05, \*\*p<0.01.

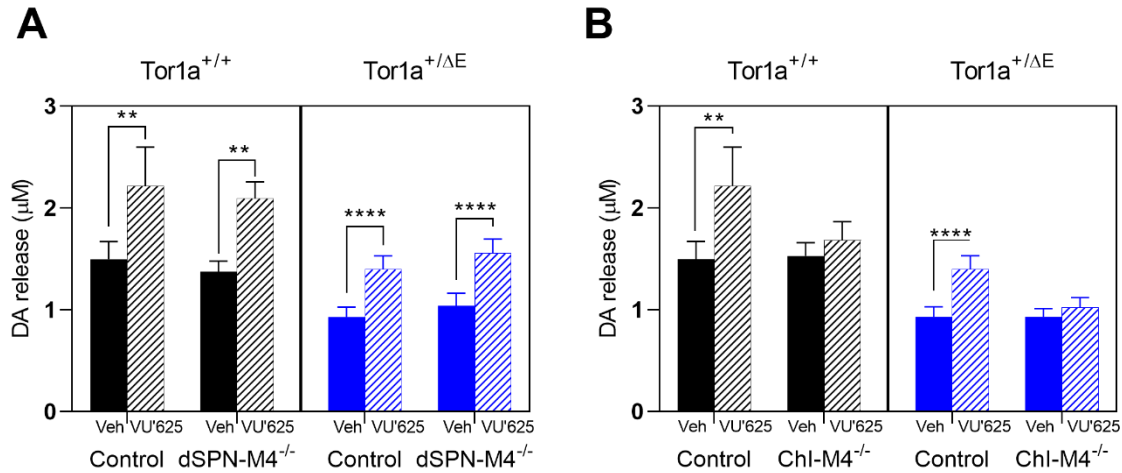

**Fig 3. Effect of M4 mAChR KO in dSPNs or Chls on the VU6021625-induced increase in DA release (A)** KO of M4 mAChR from dSPNs did not significantly change the DA release-enhancing effects of 300nM VU6021625 in either genotype. **(B)** KO of M4 mAChR from Chls reduced the DA release enhancing effects of VU6021625 in both *Tor1a*<sup>+/+</sup> and *Tor1a*<sup>+/ $\Delta$ E</sup> mice. Data are expressed as concentration of DA released (μM) ± SEM (all groups n=6); \*\*p<0.01, \*\*\*\*p<0.0001.

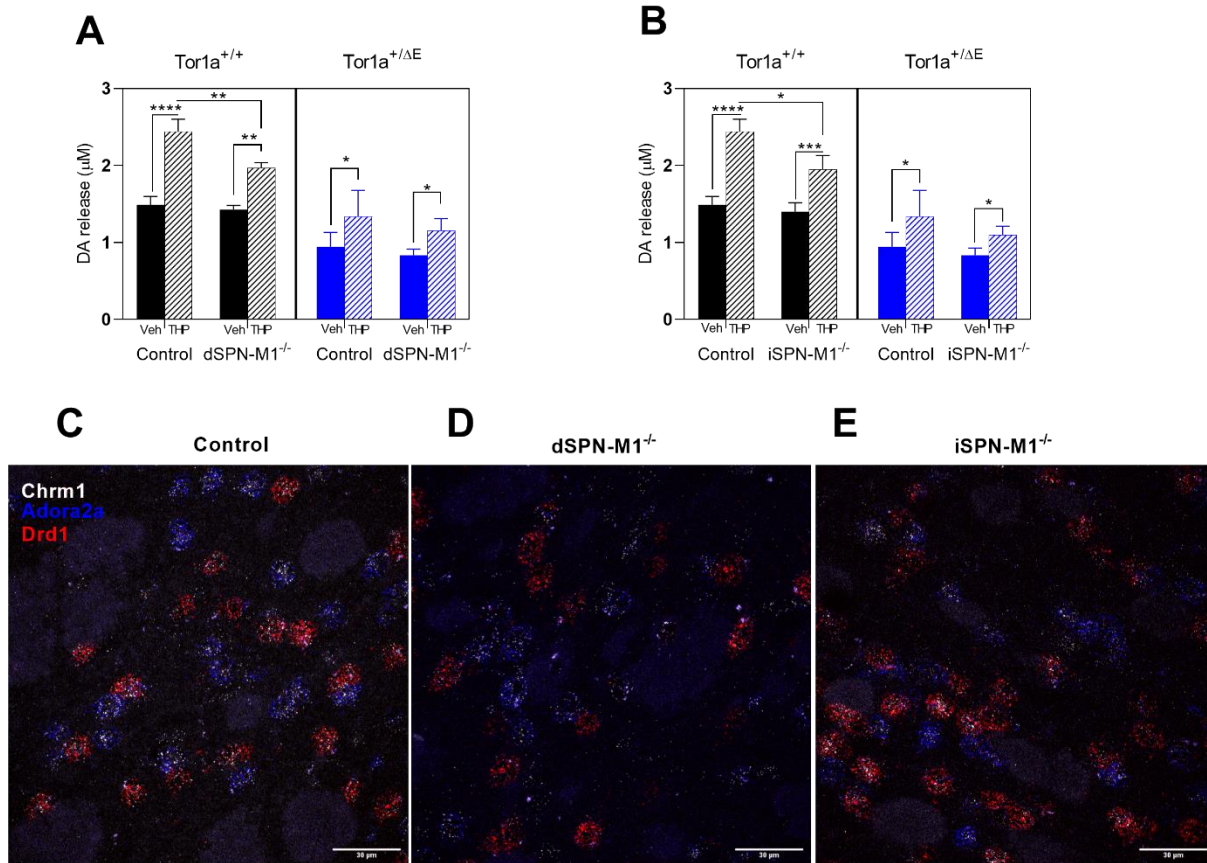

**Fig 4. Effect of cell-type specific deletion of M1 mAChRs on striatal DA release in *Tor1a*<sup>+/+</sup> and *Tor1a*<sup>+/ΔE</sup> KI mice (A) KO of M1 mAChR from dSPNs reduced but did not eliminate the effects of THP in *Tor1a*<sup>+/+</sup> mice. However, KO of M1 mAChR from direct SPNs did not alter the effects of THP in *Tor1a*<sup>+/ΔE</sup> KI mice. (B) KO of M1 mAChR from indirect SPNs in *Tor1a*<sup>+/+</sup> mice reduced but did not eliminate the effects of THP. KO of M1 mAChR from indirect SPNs in *Tor1a*<sup>+/ΔE</sup> KI mice did not alter the effects of THP. Data are expressed as concentration of DA released (μM) ± SEM. (all groups n=6); \*p<0.05, \*\*p<0.01, \*\*\*p<0.001, \*\*\*\*p<0.0001. Representative images of control (C), dSPN-M1<sup>-/-</sup> (D), and iSPN-M1<sup>-/-</sup> (E) mice labeled for ChAT, Chrm4, and Drd1 mRNA.**

| Table 2                |                                     | M1 mAChR KO mouse validation |                                  |                        |
|------------------------|-------------------------------------|------------------------------|----------------------------------|------------------------|
|                        |                                     | <i>Cell Markers</i>          |                                  |                        |
| Genotype               | <i>Adora2a</i> +,<br><i>Chrm1</i> + | <i>Adora2</i> +              | <i>Drd1</i> +,<br><i>Chrm1</i> + | <i>Drd1</i> +          |
| Control                | 47.4±4.0%<br>(213)                  | 3.2±0.6%<br>(16)             | 49.1±3.1%<br>(226)               | 0.2±0.2%<br>(1)        |
| dSPN-M1 <sup>-/-</sup> | 46.5±3.4%<br>(220)                  | 4.0±0.3%<br>(20)             | 2.3±0.6%****<br>(11)             | 46.9±3.3%****<br>(223) |
| iSPN-M1 <sup>-/-</sup> | 4.4±1.0%***<br>(23)                 | 42.3±3.2%****<br>(224)       | 52.8±3.7%<br>(279)               | 0.4±0.4%<br>(2)        |

Table 2. **M1 mAChR KO mouse validation.** Quantification of *Chrm1*- *Adora2a*- and *Drd1*-positive cells in M1 mAChR cell-type specific knockout mice. Data represent mean percentage ± SEM of positive cells (number of cells). Data within each column were analyzed with one-way ANOVA with *post hoc* Dunnett's multiple comparisons test. \*\*\* p < 0.001, \*\*\*\* p < 0.0001 compared to Control.
